# Supplementary material for: cPLA2α inhibition leads to RIP1 kinase-dependent cell death in acute leukemia cells
Source: Research Square preprint supplement (doi:10.21203/rs.3.rs-6922842/v1), 2025-07-17
Supplement: Supplementary file 1 [file d9eb08ef37fd1130e48679eb.docx]

# Supplemental Information

## Supplemental Figure 1

1. The dose-response and IC50 values of AVX420 in CCRF-CEM and Jurkat cells were assessed over 24- 48- and 72-hour periods using CTG viability assays.
2. The graph represents DNA fluorescence histograms from propidium iodide-stained CCRF-CEM cells. These cells were either treated with vehicle (control) or exposed to AVX420 or doxorubicin, followed by flow cytometry analysis.

Data are presented as the mean ± standard deviation, and each measurement was repeated at least three times independently.

## Supplemental Figure 2

1. CCRF-CEM cells were exposed to increasing concentrations of AVX420 (from 0.25 to 2 μM) and doxorubicin (0.25 μM) for 24 hours. Representative western blot visualization, accompanied by quantitative data, displayed the protein expression levels of cleaved caspase-3 and PARP-1 in cell lysates, all normalized to β-actin values.
2. CCRF-CEM and Jurkat cells were pretreated with Z-VAD-FMK for 30 minutes before exposure to AVX420 or doxorubicin for 24 hours. Using flow cytometry, viability was determined by propidium iodide exclusion.
3. CCRF-CEM cells were pre-incubated with apoptosis, ferroptosis, and necroptosis inhibitors for 30 minutes, followed by a 24-hour incubation with AVX420. Cell viability was measured using the CTG viability assay.

Data are the mean + standard deviation of at least three independent experiments. *p<0.05, **p<0.01, ***p<0.001, ****p<0.0001, compared to untreated control or between doses highlighted with a bar.

## Supplemental Figure 3

1. Two additional biological replicates of Western blot and densitometric analysis showing P-RIP3, P-MLKL, and β-actin in CCRF-CEM cell lysates treated for 24 hours with the indicated concentrations of AVX420 and TSZ, in the presence or absence of Necrostatin-1.
2. Flow cytometry gating diagrams are displayed for cells stained with Bodipy 581/591 C11.
3. CCRF-CEM and Jurkat cells were subjected to varying doses of AVX420 for 4 hours. Cell viability was assessed using flow cytometry post-staining with propidium iodide.

## Supplemental Figure 4

1. Illustrative figures depicting the analysis of cells stained with propidium iodide following their data capture via flow cytometry. CCRF-CEM and Jurkat cells were first pretreated with inhibitors targeting apoptosis, ferroptosis, and necroptosis pathways to block specific cell death mechanisms. After pretreatment, the cells were exposed to AVX420 as well as corresponding positive control compounds for a 24-hour incubation period. Data are presented as the mean + standard deviation, and each measurement was repeated at least three times independently. *p<0.05, **p<0.01, ***p<0.001, ****p<0.0001, compared to respective single doses.

## Supplemental Figure 5

1. Flow cytometry gating diagrams are displayed for cells stained with MitoSOX.
2. A representative image shows gating diagrams for cells stained with JC-1.

## Supplemental Figure 6

1. (i) A representative image shows gating diagrams for cells stained with ROS Deep Red Dye. (ii-iii) CCRF-CEM and Jurkat cells were preincubated with Z-VAD-FMK (50 μM), liproxstatin-1 (5 μM), CuATSM (2.5 μM), necrostatin-1 (50 μM), GSH (2.5 mM), and NAC (2.5 mM) for 30 minutes. They were then treated with various doses of AVX420 for 4 hours. ROS was identified through flow cytometry after staining with ROS deep red dye. Data are presented as the mean + standard deviation, and each measurement was performed independently at least three times. *p<0.05, **p<0.01, ***p<0.001, ****p<0.0001, compared to the untreated control.
2. Flow cytometry gating diagrams are displayed for cells stained with MitoSOX.
3. Flow cytometry gating diagrams are displayed for cells stained with Bodipy 581/591 C11.
4. A representative image shows gating diagrams for cells stained with JC-1.
